# Supplementary material
Source: Springer Nature journal article supplement (https://www.springermedizin.de/resource/supplementary/12889_2012_5024_MOESM4_ESM.pdf/9493224)
Supplement: MOESM4 [file 9493224]

**Table 1**Subject characteristics and crude odds ratio for migrants ( $n_{\text{raw}}=1543$ ;  $n_{\text{weighted}}=3681$ )

|                                   | Shenzhen<br>Study<br>Population<br>(weighted) | 4th<br>National<br>Census -<br>Shenzhen<br>city<br>(N=3,681) | Effect<br>size <sup>4</sup> | Registered<br>(n=793) | Migrants<br>(n=750) | Migrant<br>Crude OR<br>(95% C.I.) |
|-----------------------------------|-----------------------------------------------|--------------------------------------------------------------|-----------------------------|-----------------------|---------------------|-----------------------------------|
|                                   | % <sup>3</sup>                                | % <sup>3</sup>                                               |                             | n (%)                 | n (%)               |                                   |
| Female <sup>1</sup>               | 50.4                                          | 50.7                                                         | <b>0.01</b>                 | 422 (53.2)            | 356 (47.5)          | 0.80 (0.65, 0.99)                 |
| Age group (years) <sup>1</sup>    |                                               |                                                              |                             |                       |                     |                                   |
| 18-24                             | 13.9                                          | 13.9                                                         | <b>0</b>                    | 120 (15.1)            | 166 (22.1)          | 1                                 |
| 25-34                             | 32.3                                          | 32.3                                                         |                             | 263 (33.2)            | 319 (42.5)          | 0.88 (0.66, 1.17)                 |
| 35-44                             | 24.5                                          | 24.5                                                         |                             | 224 (28.2)            | 156 (20.8)          | 0.51 (0.37, 0.69)                 |
| 45-54                             | 14                                            | 14                                                           |                             | 99 (12.5)             | 46 (6.1)            | 0.34 (0.23, 0.52)                 |
| 55-64                             | 8.3                                           | 8.3                                                          |                             | 44 (5.5)              | 31 (4.1)            | 0.53 (0.32, 0.89)                 |
| 65+                               | 7.1                                           | 7                                                            |                             | 30 (3.8)              | 22 (2.9)            | 0.55 (0.30, 0.99)                 |
| Marital Status <sup>1</sup>       |                                               |                                                              |                             |                       |                     |                                   |
| Single/separated/widowed          | 25.6                                          | 19                                                           | <b>0.17</b>                 | 198 (25.0)            | 278 (37.1)          |                                   |
| Married                           | 74.4                                          | 81                                                           |                             | 595 (75.0)            | 472 (62.9)          | 0.54 (0.43, 0.67)                 |
| Education Attainment <sup>1</sup> |                                               |                                                              |                             |                       |                     |                                   |
| Primary or below                  | 10.3                                          | 17.6                                                         | <b>0.43</b>                 | 44 (5.5)              | 72 (9.6)            | 1.22 (0.80, 1.87)                 |
| Middle/high school                | 46.5                                          | 57.4                                                         |                             | 319 (40.2)            | 412 (54.9)          | 1                                 |
| College or above                  | 43.2                                          | 25                                                           |                             | 430 (54.2)            | 266 (35.5)          | 0.47 (0.37, 0.58)                 |
| Occupation <sup>1</sup>           |                                               |                                                              |                             |                       |                     |                                   |
| Executive/professional/managerial | -                                             | -                                                            |                             | 148 (18.7)            | 76 (10.1)           | 0.40 (0.29, 0.54)                 |
| Ordinary worker                   | -                                             | -                                                            |                             | 378 (47.7)            | 468 (62.4)          | 1                                 |
| Unemployed                        | 35.3                                          | 39.7                                                         | <b>0.07</b>                 | 267 (33.7)            | 206 (27.5)          | 0.64 (0.50, 0.82)                 |
| Monthly income <sup>2</sup>       |                                               |                                                              |                             |                       |                     |                                   |
| No income                         | 27.2                                          | -                                                            |                             | 179 (22.6)            | 189 (25.2)          | 1.08 (0.83, 1.42)                 |
| Low income                        | 14.8                                          | -                                                            |                             | 72 (9.1)              | 343 (45.7)          | 1.83 (1.29, 2.59)                 |
| Middle income                     | 43.3                                          | -                                                            |                             | 201 (25.3)            | 189 (25.2)          | 1                                 |
| High income                       | 14.7                                          | -                                                            |                             | 341 (43.0)            | 88 (11.7)           | 0.42 (0.29, 0.59)                 |
| Insurance status                  |                                               |                                                              |                             |                       |                     |                                   |
| Uninsured                         |                                               |                                                              |                             | 97 (12.2)             | 304 (40.5)          | 1                                 |
| Basic MIS only                    |                                               |                                                              |                             | 422 (53.2)            | 275 (36.7)          | 0.17 (0.13, 0.23)                 |
| Additional MIS only               |                                               |                                                              |                             | 25 (3.2)              | 66 (8.8)            | 0.82 (0.48, 1.41)                 |
| Basic + Additional MIS            |                                               |                                                              |                             | 212 (26.7)            | 98 (13.1)           | 0.13 (0.09, 0.18)                 |
| Registered                        | 53.3                                          | -                                                            |                             | -                     | -                   |                                   |

Note: C.I. denotes lower and upper limit of 95% confidence interval

<sup>1</sup> Categories were constructed to be compatible with published census figures.<sup>2</sup> Income categories are constructed by quintiles, where "low" income denotes the first quintile (<20%), "middle" income denotes between second and fourth quintile (20-60%) and "high" income denotes fifth quintile or above (>60%).<sup>3</sup> The proportions may not add up to 100% due to rounding.<sup>4</sup> Effect size is a statistical measure that indicates the similarity of the sample compared to the underlying population, where an effect size of 0.1 is considered "small", 0.3 "medium" and 0.5 "large".
